# Supplementary material
Source: publisher figshare collection journal article supplement (https://gsajournals.figshare.com/articles/dataset/_/9844502)
Supplement: Supplementary file 1 [file 1]

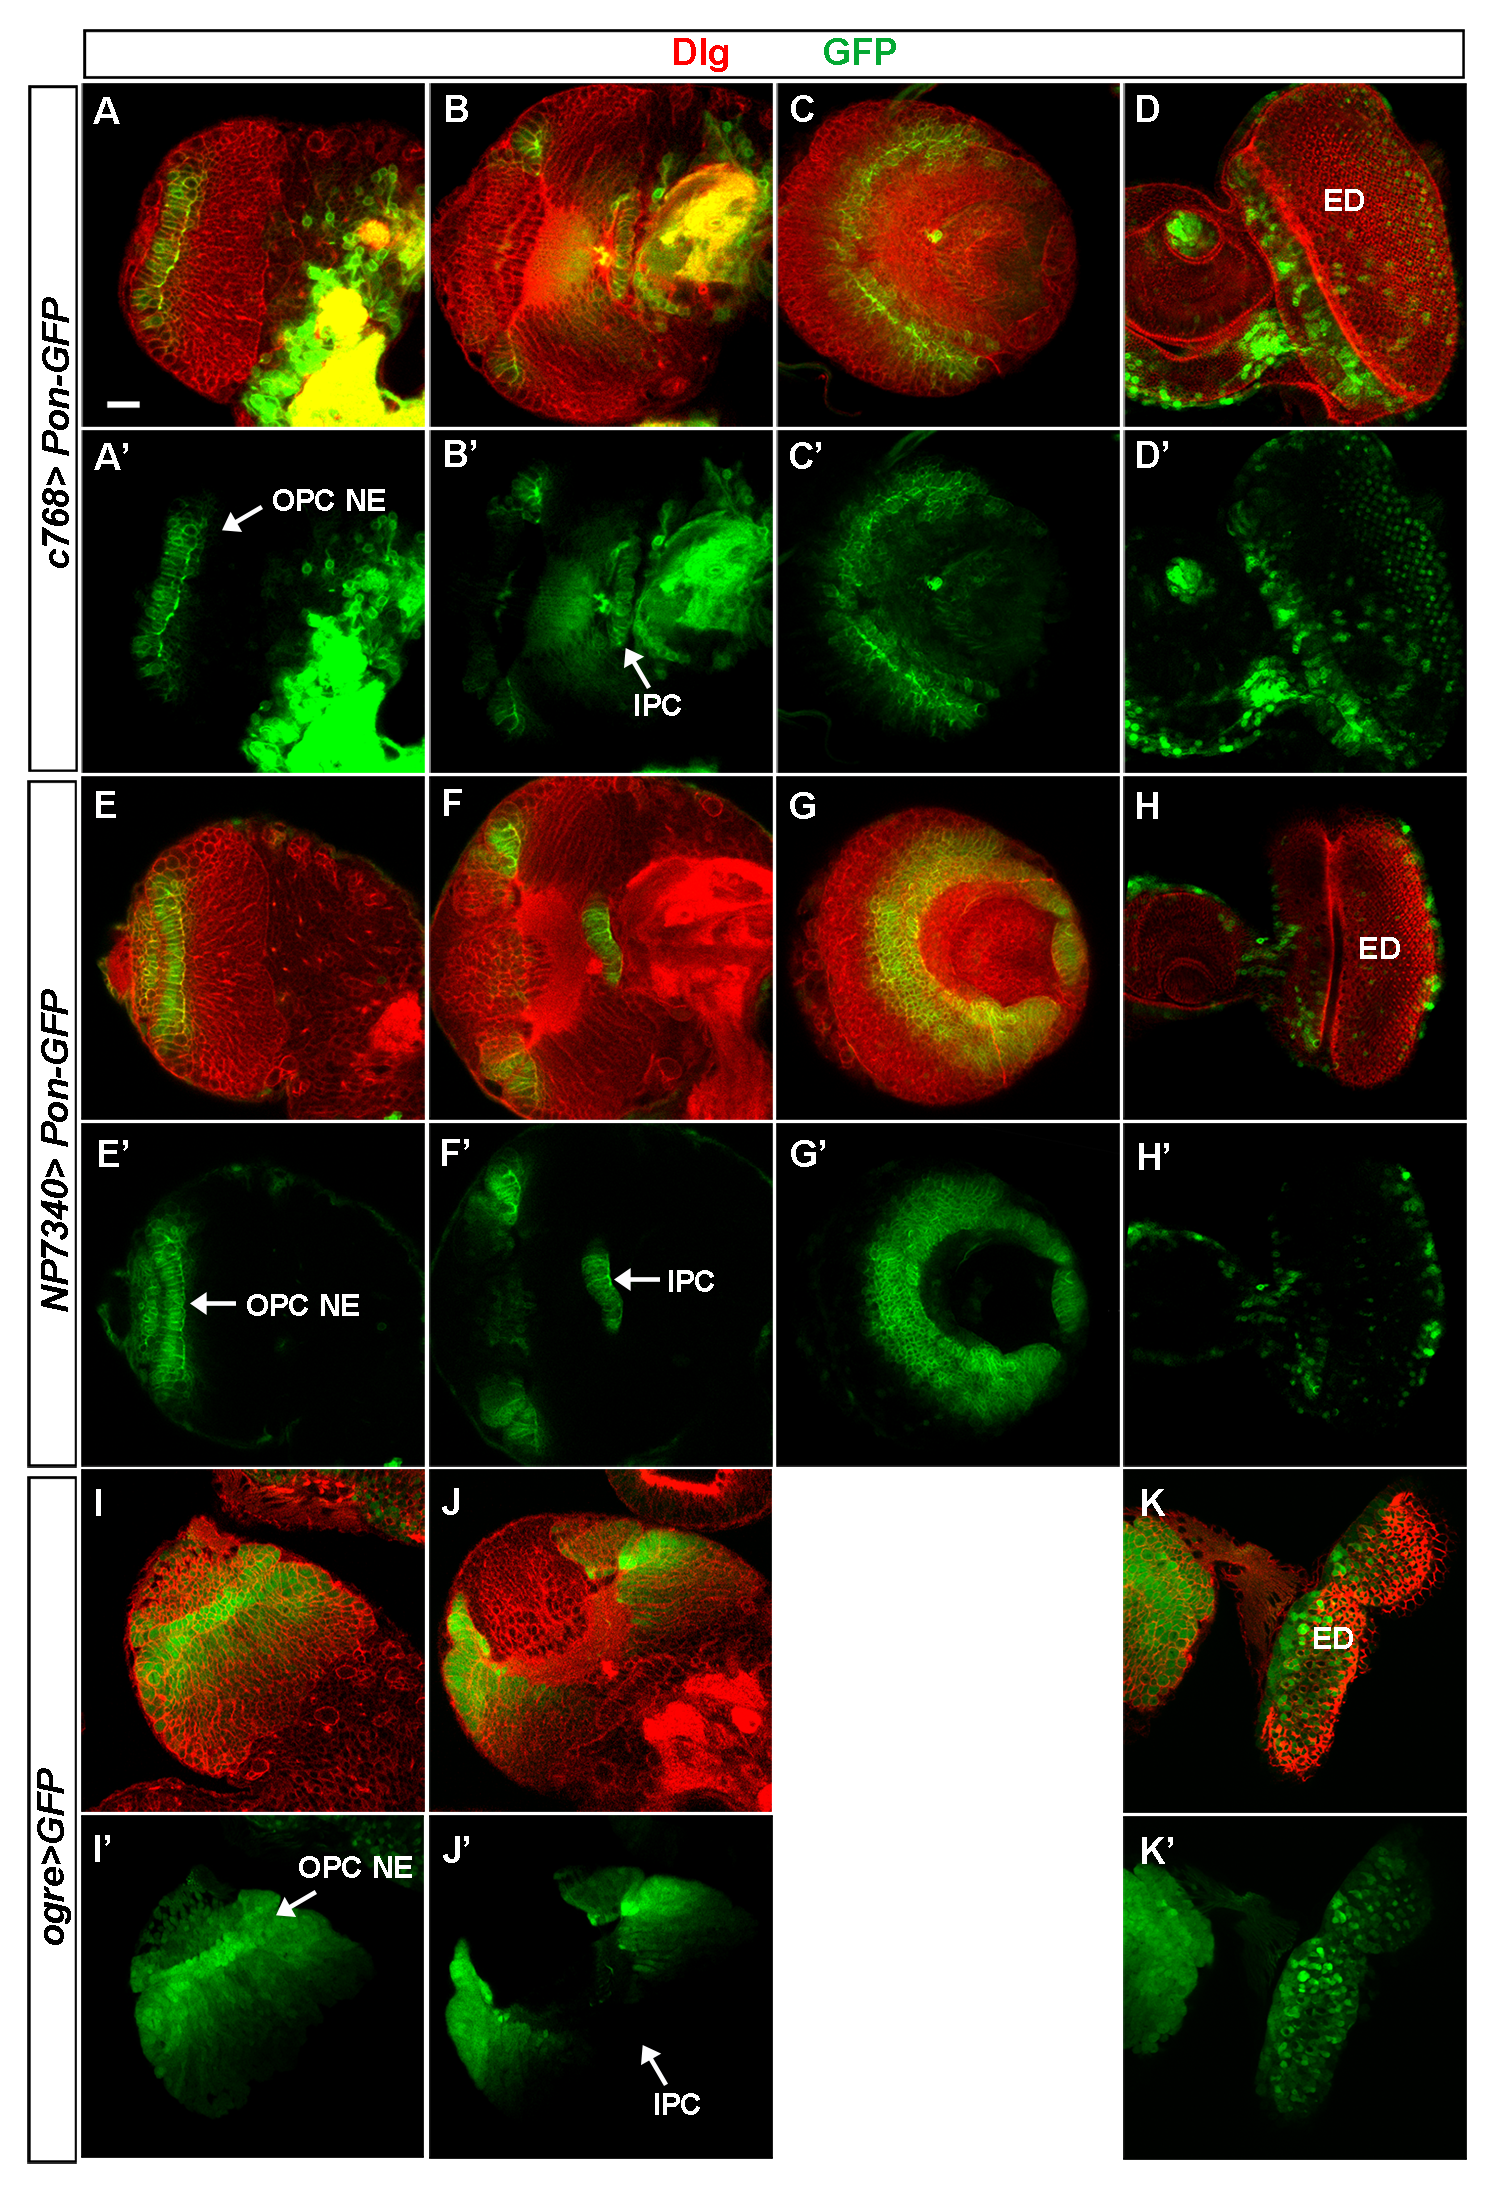


**Figure S1** Expression patterns of *c768-Gal4*, *NP7340-Gal4* and *ogre-Gal4*. (A-D’)*c768-Gal4* driven *UAS-Pon-GFP* expression. *c768-Gal4* is active in the OPC NEs (A, A’; C, C’) and IPC NEs (B, B’), in the medulla neuropil (B, B’), in the central brain (B, B’), and in the anterior and the posterior part of the eye disc (D, D’). (E-H’) *NP7340-Gal4* driven *UAS-Pon-GFP* expression. *NP7340-Gal4* is active in the OPC NEs (E, E’; G, G’) and IPC NEs (F, F’), and in some glial cells in the eye disc (H, H’). (I-K’) *ogre-Gal4* driven *UAS-GFP* expression. *ogre-Gal4* is active in the OPC NEs but not active in the IPC; there is strong expression in the eye disc (K, K’). (A, A’, B, B’, D, D’, E, E’, F, F’, H, H’, I, I’, J, J’, K, K’): lateral is to the left. (C, C’, G, G’): anterior is to the left. Scale bar: 20 m.
